# Supplementary material for: Back-to-cyclic monomers: chemical recycling of silicone waste using a [polydentate ligand–potassium silanolate] complex
Source: Royal Society of Chemistry journal article supplement (doi:10.1039/d3gc00293d), 2023-01-01
Supplement: d3gc00293d1.pdf [file d3gc00293d1.pdf]

## Supporting information

# Back-to-cyclic-monomers: chemical recycling of silicone wastes using a [polydentate ligand-potassium silanolate] complex

Nam Duc Vu,<sup>a</sup> Aurélie Boulegue-Mondière,<sup>b</sup> Nicolas Durand,<sup>b</sup> Jean Raynaud<sup>\*a</sup> and Vincent Monteil<sup>\*a</sup>

<sup>a</sup>Laboratory of Catalysis, Polymerization, Processes and Materials, CP2M (UMR 5128, CNRS/Université de Lyon 1- Claude Bernard/CPE Lyon), Université de Lyon, 43 Bd du 11 Nov. 1918, 69616 Villeurbanne cedex, France. Email : *jean.raynaud@univ-lyon1.fr*, *vincent.monteil@univ-lyon1.fr*

<sup>b</sup>Elkem Silicones, R&D Chemistry, R&I centre « ATRiON », 9 rue Spécia 69190 Saint-Fons, France.

## 1. General information

All silicone oils, catalysts and solvents used were purchased from commercial suppliers (e.g. Sigma-Aldrich, TCI Chemical, Fisher, abcr) or supplied by our industrial partner (Elkem Silicones©) then were used without further purification. Nuclear magnetic resonance spectra were recorded on a Brüker DRX 300 ( $^1\text{H}$ -300 MHz,  $^{13}\text{C}$ -75 MHz and  $^{29}\text{Si}$ -59.6 MHz). Chemical shifts are given in ppm with reference to residual  $\text{CHCl}_3$  central peaks: 7.26 ppm for proton, 77.16 ppm for carbon, respectively; residue acetone- $d_6$  central peaks: 2.05 ppm for proton, 206.26 and 29.84 ppm for carbon, respectively; J values are given in Hertz (Hz). Abbreviations are defined as follows: s = singlet, d = doublet, dd = doublet of doublets, t = triplet, q = quadruplet, m = multiplet, br = broad.

## 2. General procedures

### 2.1. General procedure for the depolymerisation of siloxanes oil 1 (decagram scale)

In a flask (50 mL) connecting with a short Vigreux column, siloxane oil **1** (10 mL, 9.5 g, 120 mmol  $\text{Me}_2\text{SiO}$  unit),  $\text{KOSiMe}_3$  (14 mg, 0.1 mol%), 18C6 (30 mg, 0.1 mol%) were introduced then this mixture was heated at  $140^\circ\text{C}$  for 1 hour. Then, the reaction mixture was distilled under reduced pressure ( $140^\circ\text{C}$ , 10mbar) to give a mixture of cyclosiloxanes  $\text{D}_3$ ,  $\text{D}_4$ ,  $\text{D}_5$  (9.2 g, 97% yield) as a colourless liquid.  $^1\text{H-NMR}$  (300 MHz,  $\text{CDCl}_3$ ):  $\delta_{\text{H}} = 0.17$  ( $\text{CH}_3$  in  $\text{D}_3$ ), 0.09 ( $\text{CH}_3$  in  $\text{D}_4$ ), 0.08 ( $\text{CH}_3$  in  $\text{D}_5$ );  $^{13}\text{C-NMR}$  (75 MHz,  $\text{CDCl}_3$ ):  $\delta_{\text{C}} = 1.08$  ( $\text{CH}_3$  in  $\text{D}_3$ ), 0.93 ( $\text{CH}_3$  in  $\text{D}_4$ ), 1.05 ( $\text{CH}_3$  in  $\text{D}_5$ );  $^{29}\text{Si-NMR}$  (59.6 MHz,  $\text{CDCl}_3$ ):  $\delta_{\text{Si}} = 7.2$  ( $(\text{Me}_3\text{Si})_2\text{O}$ ), -8.4 ( $\text{SiMe}_2\text{O}$  in  $\text{D}_3$ ), -19.2 ( $\text{SiMe}_2\text{O}$  in  $\text{D}_4$ ), -21.6 ( $\text{SiMe}_2\text{O}$  in  $\text{D}_5$ ).

### 2.2. General procedure for the depolymerisation of waste siloxanes oil 2 (100 g scale)

In a flask (250 mL) connecting with a long Vigreux column, waste siloxane oil **2** (100 g),  $\text{KOSiMe}_3$  (142 mg, 0.1 mol%), 18C6 (300 mg, 0.1 mol%) were introduced then this mixture was heated at  $140^\circ\text{C}$  for 1 hour. Then, the reaction mixture was distilled under reduced pressure ( $140^\circ\text{C}$ , 10mbar) in 3 hours to give a mixture of cyclosiloxanes  $\text{D}_3$ ,  $\text{D}_4$ ,  $\text{D}_5$  (99 g, 99% yield) as a colourless liquid.

### 2.3. General procedure for the polymerisation of a mixture of cyclic siloxanes oil (100 g scale)

An obtained mixture of siloxanes from the depolymerisation of waste silicone oil **2** (99 g) and hexamethyldisiloxane (0.6 g) were introduced in a three-neck round bottom flask then this mixture was heated to  $160^\circ\text{C}$ . At this temperature,  $\text{KOSiMe}_3$  (50 ppm) and 18C6 (4 ppm) were added and the polymerisation experiment were performed at  $160^\circ\text{C}$  for 3 hours. Then, the reaction was cooled down to room temperature and a neutralized solution containing phosphoric acid was introduced. Finally, the result mixture was evaporated (devolatilization step) under reduced pressure ( $170^\circ\text{C}$ , 1 mbar) for 3 hours to give a silicone oil (87 g, 87% yield) as a colourless liquid.  $^1\text{H-NMR}$  (300 MHz,  $\text{CDCl}_3$ ):  $\delta_{\text{H}} = 0.07$  (s);  $^{13}\text{C-NMR}$  (75 MHz,  $\text{CDCl}_3$ ):  $\delta_{\text{C}} = 1.2$ ;  $^{29}\text{Si-NMR}$  (59.6 MHz,  $\text{CDCl}_3$ ):  $\delta_{\text{Si}} = -21.9$  ( $\text{SiMe}_2\text{O}$ ), 7.3 ( $\text{OSiMe}_3$ ); SEC (toluene):  $M_n = 8200$  g/mol (DPI = 2).

#### 2.4. General procedure for the catalyst recycling (decagram scale)

In a flask (50 mL) connecting with a short Vigreux column, siloxane oil **1** (10 mL, 9.5 g, 120 mmol Me<sub>2</sub>SiO unit), KOSiMe<sub>3</sub> (14 mg, 0.1 mol%), 18C6 (30 mg, 0.1 mol%) were introduced then this mixture was heated at 140°C for 1 hour. Then, the reaction mixture was distilled under reduced pressure (140°C, 10mbar) to give a mixture of cyclosiloxanes (D<sub>3</sub>, D<sub>4</sub>, D<sub>5</sub>) (9.15 g, 96% yield) as a colourless liquid. After removing most of volatile products, the catalysts were remained in a residue with a little of polysiloxanes. The catalyst was reused by adding further amounts of silicone oil after complete turnover. A small amount of silicone oil is always kept in the flask at the end of the distillation to prevent the sublimation of pure catalyst or complexing agent (KOSiMe<sub>3</sub>, 18C6). Finally, after 5 cycles, the flask was cooled down, then a small amount of CDCl<sub>3</sub> was introduced to dissolve this residue and analysed it in <sup>29</sup>Si-NMR.

#### 2.5. General procedure for depolymerization of fluorosilicone **12**

In a flask (50 mL) connecting with a short Vigreux column, siloxane oil **12** (10.6 g, 120 mmol Me<sub>2</sub>SiO unit), KOSiMe<sub>3</sub> (14 mg, 0.1 mol%), 18C6 (30 mg, 0.1 mol%) were introduced then this mixture was heated at 160°C for 1 hour. Then, the reaction mixture was distilled under reduced pressure (160°C, 0.1 mbar) to give a mixture of fluoro-substituted cyclosiloxanes D<sub>4</sub><sup>F</sup> (2 enantiomers), D<sub>5</sub><sup>F</sup>, D<sub>6</sub><sup>F</sup> (9.6 g, 92% yield) as a colourless oil. A higher temperature and lower pressure are required due to the formation of D<sub>4</sub><sup>F</sup> (2 enantiomers), D<sub>5</sub><sup>F</sup>, D<sub>6</sub><sup>F</sup> that are higher boiling point products than conventional cyclosiloxanes (D<sub>3</sub>, D<sub>4</sub>, D<sub>5</sub>). <sup>1</sup>H-NMR (300 MHz, acetone-d<sub>6</sub>): δ<sub>H</sub>= 0.26 (t, J = 1.9, Si-CH<sub>3</sub>, D<sub>4</sub>), 0.28 (s, Si-CH<sub>3</sub>, D<sub>5</sub>), 0.30 (s, Si-CH<sub>3</sub>, D<sub>6</sub>), 0.87 (m, CH<sub>2</sub>-CH<sub>2</sub>-CF<sub>3</sub> in D<sub>4</sub>, D<sub>5</sub>, D<sub>6</sub>), 2.24 (m, CH<sub>2</sub>-CH<sub>2</sub>-CF<sub>3</sub> in D<sub>4</sub>, D<sub>5</sub>, D<sub>6</sub>); <sup>13</sup>C-NMR (75 MHz, acetone-d<sub>6</sub>): δ<sub>C</sub>= -0.7 (Si-CH<sub>3</sub>, D<sub>4</sub>), -0.6 (Si-CH<sub>3</sub>, D<sub>5</sub>), -0.2 (Si-CH<sub>3</sub>, D<sub>6</sub>), 9.7 (CH<sub>2</sub>-CH<sub>2</sub>-CF<sub>3</sub> in D<sub>4</sub>), 9.9 (CH<sub>2</sub>-CH<sub>2</sub>-CF<sub>3</sub> in D<sub>5</sub>), 10.3 (CH<sub>2</sub>-CH<sub>2</sub>-CF<sub>3</sub> in D<sub>6</sub>), 28.6 (CH<sub>2</sub>-CH<sub>2</sub>-CF<sub>3</sub> in D<sub>4</sub>), 29.0 (CH<sub>2</sub>-CH<sub>2</sub>-CF<sub>3</sub> in D<sub>5</sub>), 28.1 (CH<sub>2</sub>-CH<sub>2</sub>-CF<sub>3</sub> in D<sub>6</sub>), 127.4 (CH<sub>2</sub>-CH<sub>2</sub>-CF<sub>3</sub> in D<sub>4</sub>), 131.1 (CH<sub>2</sub>-CH<sub>2</sub>-CF<sub>3</sub> in D<sub>5</sub>), 134.8 (CH<sub>2</sub>-CH<sub>2</sub>-CF<sub>3</sub> in D<sub>6</sub>); <sup>29</sup>Si-NMR (59.6 MHz, acetone-d<sub>6</sub>): -20.2 and -20.4 (2 enantiomers in D<sub>4</sub>), -22.2 (D<sub>5</sub>), -22.4 (D<sub>6</sub>); <sup>19</sup>F-NMR (282 MHz, acetone-d<sub>6</sub>): -68.77, -68.80, -68.83, -68.86 (2 isomers D<sub>4</sub>+D<sub>5</sub>+D<sub>6</sub>); Ratio of each cyclosiloxane was determined by <sup>29</sup>Si-NMR: D<sub>4</sub>/D<sub>5</sub>/D<sub>6</sub>=47/48/5.

### 3. Optimised conditions

Table S1: Screening diluents for the depolymerisation of industrial waste oil

| 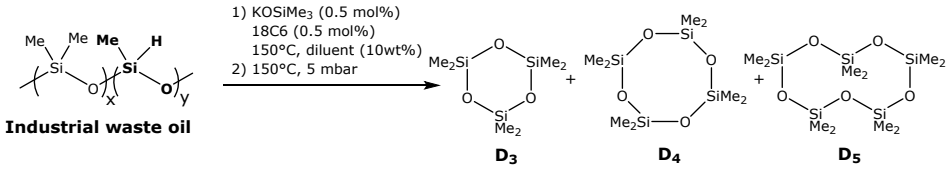 |                     |                             |
|------------------------------------------------------------------------------------|---------------------|-----------------------------|
| Diluent                                                                            | Reaction conditions | Yield of cyclosiloxanes (%) |
| $n\text{-C}_{18}\text{H}_{37}\text{-OH}$                                           | 150°C, 5 mbar       | 75                          |
| $n\text{-C}_{16}\text{H}_{33}\text{-OH}$                                           | 150°C, 5 mbar       | 74                          |
| $n\text{-C}_{22}\text{H}_{45}\text{-OH}$                                           | 150°C, 5 mbar       | 74                          |
| 2-decyl-1-tetradecanol                                                             | 150°C, 5 mbar       | 74                          |
| $\text{C}_{30}\text{H}_{62}$ (squalane)                                            | 150°C, 5 mbar       | 0                           |
| $n\text{-C}_{22}\text{H}_{46}$                                                     | 150°C, 5 mbar       | 61                          |

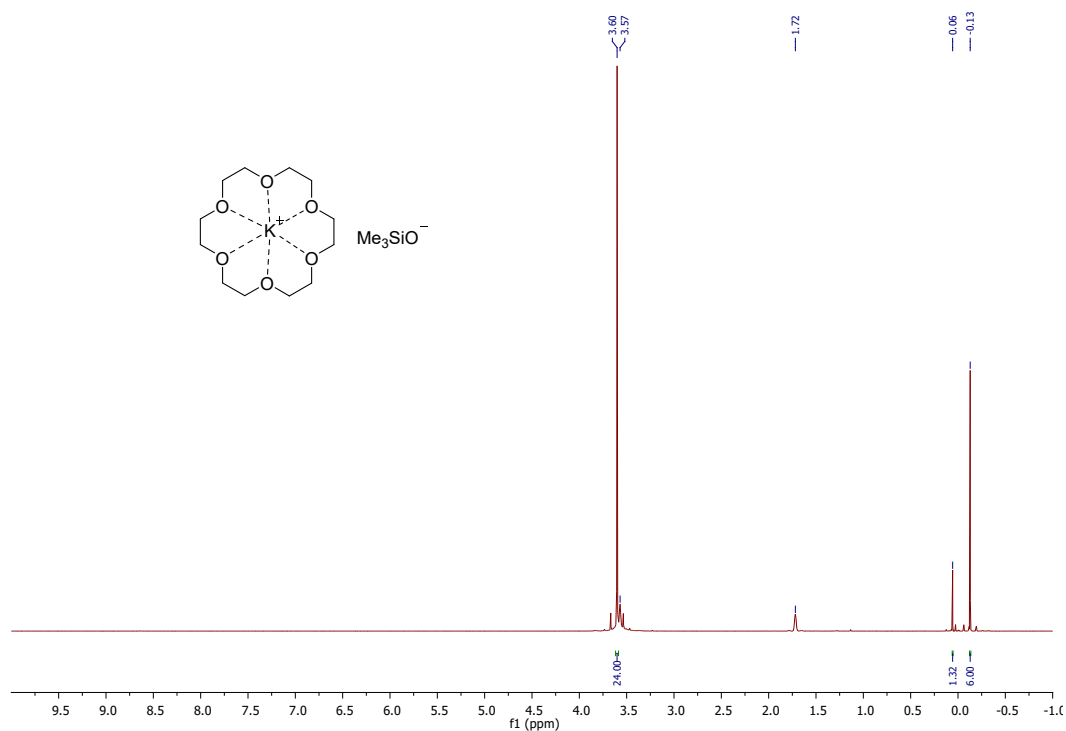

Figure S1a:  $^1\text{H}$ -NMR of  $[\text{KOSiMe}_3\text{-}18\text{C}6]$  complex in  $d_8\text{-THF}$  (25°C, 300 MHz)

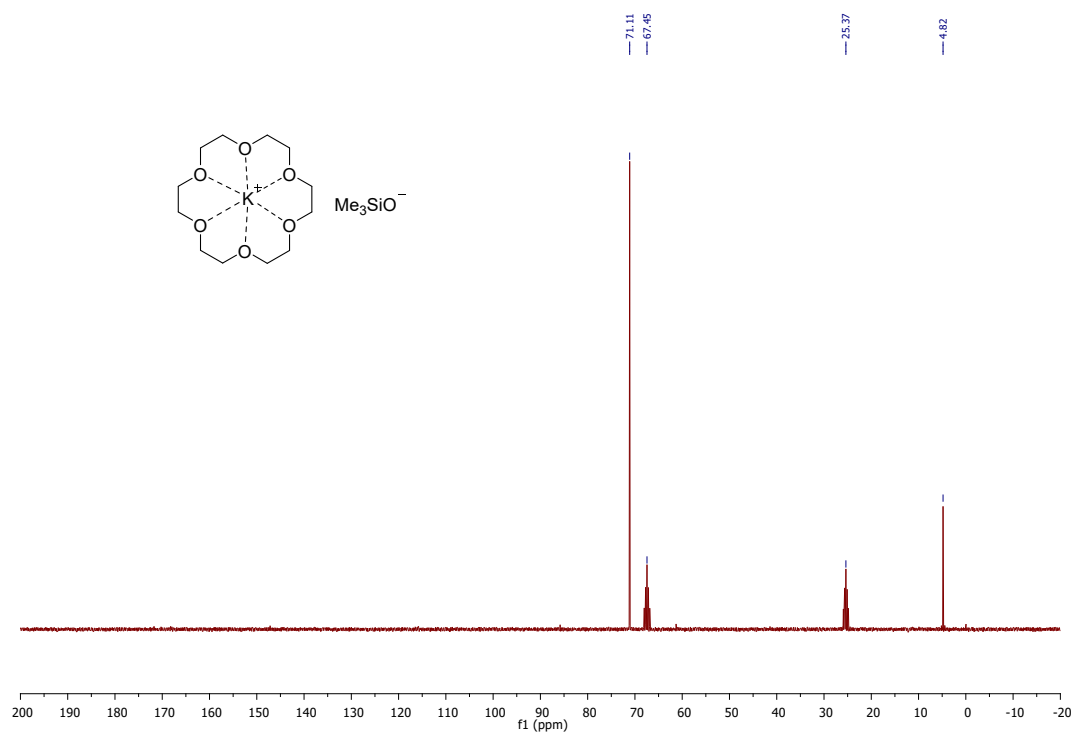

Figure S1b:  $^{13}C$ -NMR of  $[KOSiMe_3-18C_6]$  complex in  $d_8$ -THF (25°C, 75 MHz)

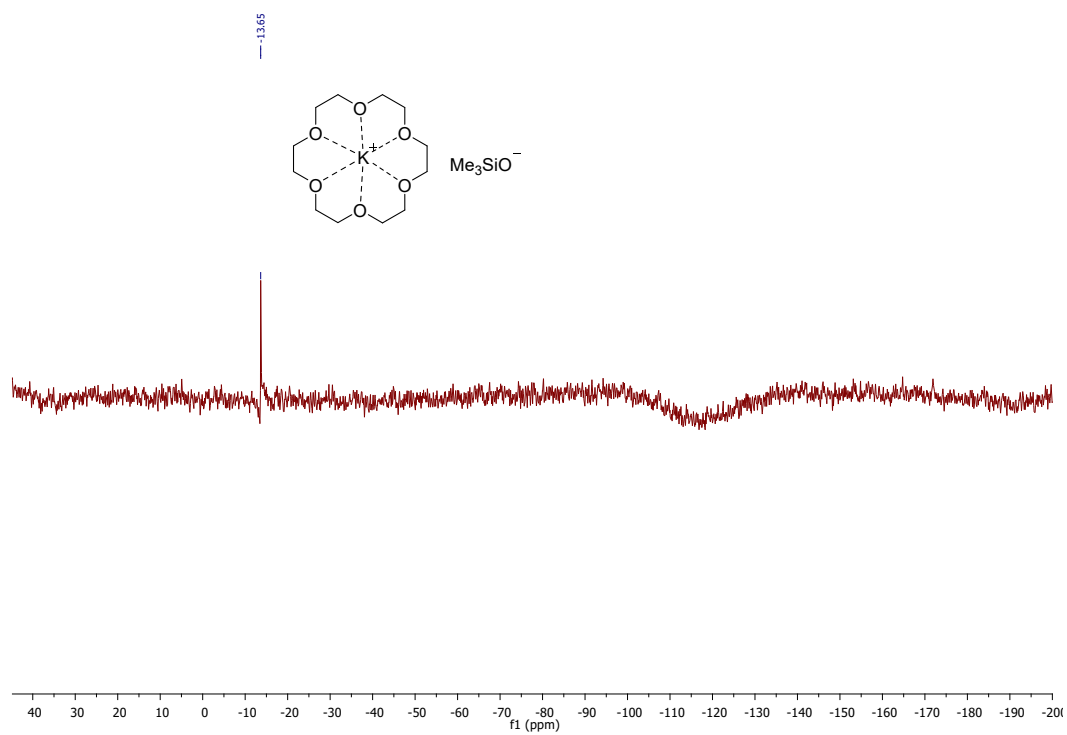

Figure S1c:  $^{29}Si$ -NMR of  $[KOSiMe_3-18C_6]$  complex in  $d_8$ -THF (25°C, 59.6 MHz)

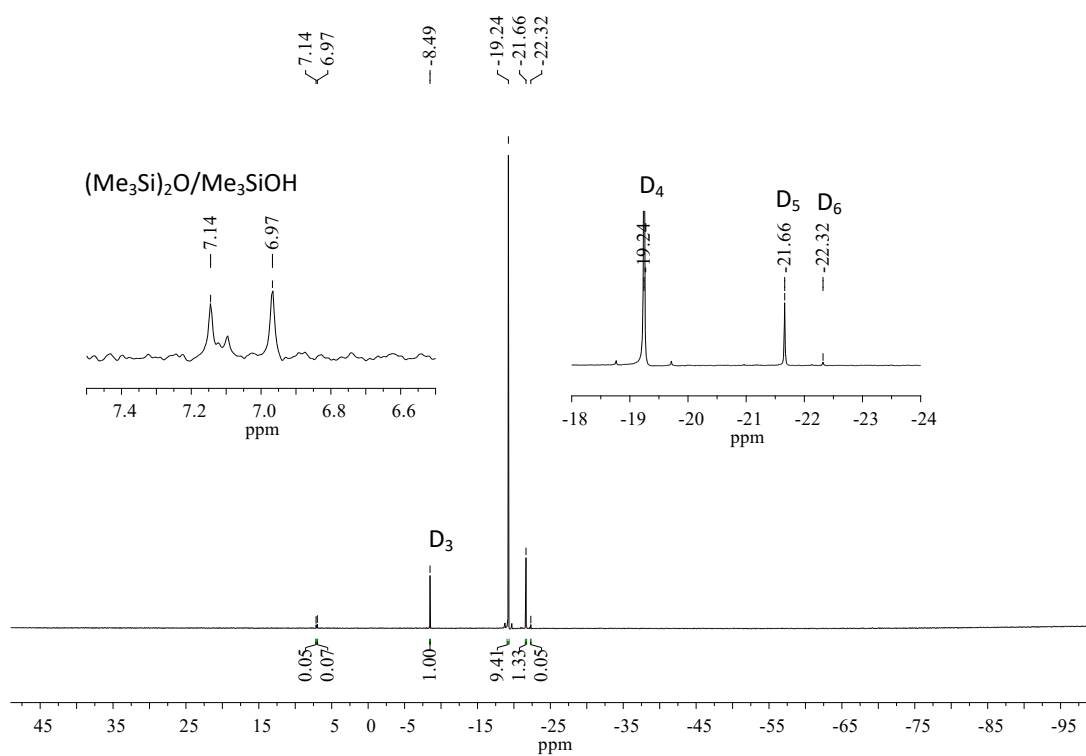

Figure S2:  $^{29}\text{Si}$ -NMR of distillation fraction in  $d$ -chloroform (150 mg in 0.5 mL  $\text{CDCl}_3$ , 25°C)

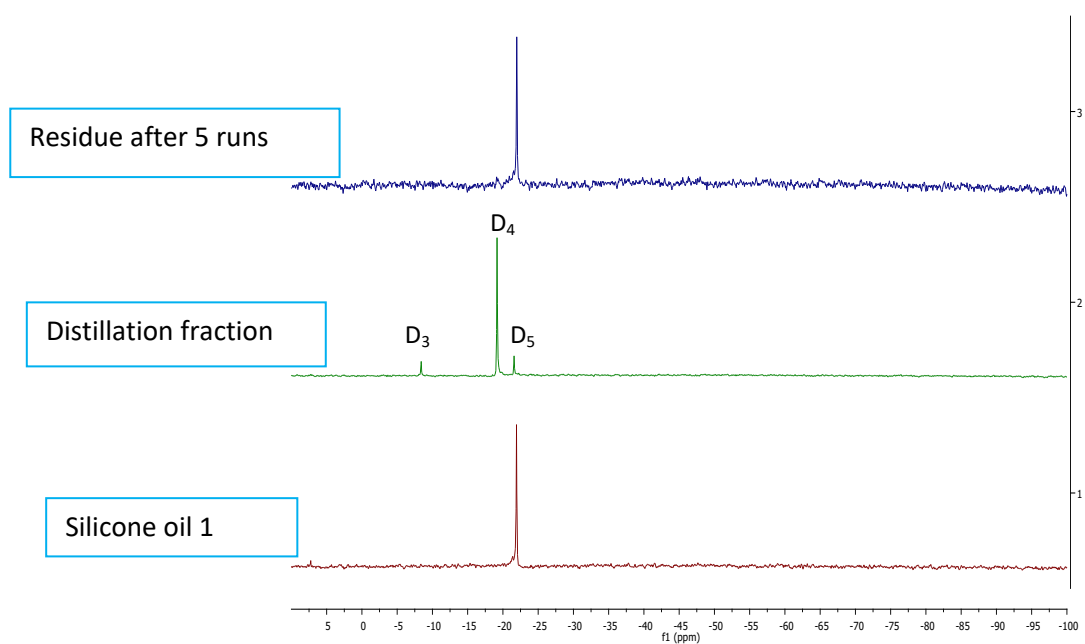

Figure S3:  $^{29}\text{Si}$ -NMR of initial oil, distillation fraction and residue in  $d$ -chloroform

#### 4. $^1\text{H}$ , $^{13}\text{C}$ , $^{19}\text{F}$ and $^{29}\text{Si}$ -NMR spectrum

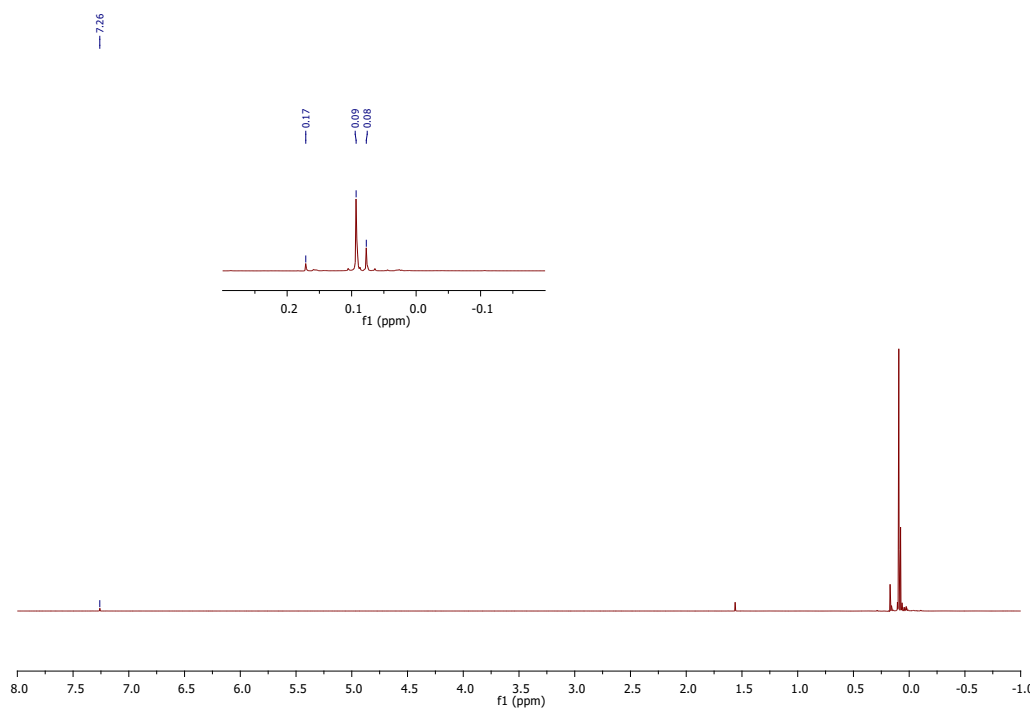

Figure S4:  $^1\text{H}$ -NMR spectrum of depolymerization products of silicone oil **1** ( $D_3$ ,  $D_4$ ,  $D_5$ ) (25°C,  $\text{CDCl}_3$ , 300 MHz)

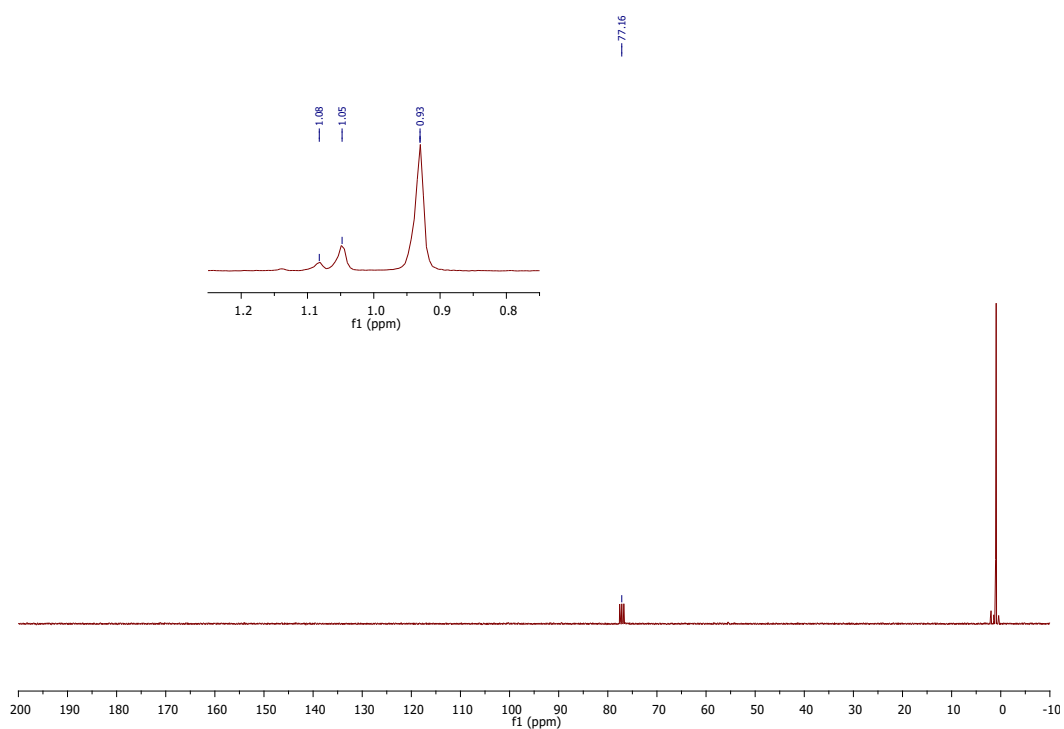

Figure S5:  $^{13}\text{C}$ -NMR spectrum of depolymerization products of silicone oil **1** ( $D_3$ ,  $D_4$ ,  $D_5$ ) (25°C,  $\text{CDCl}_3$ , 75 MHz)

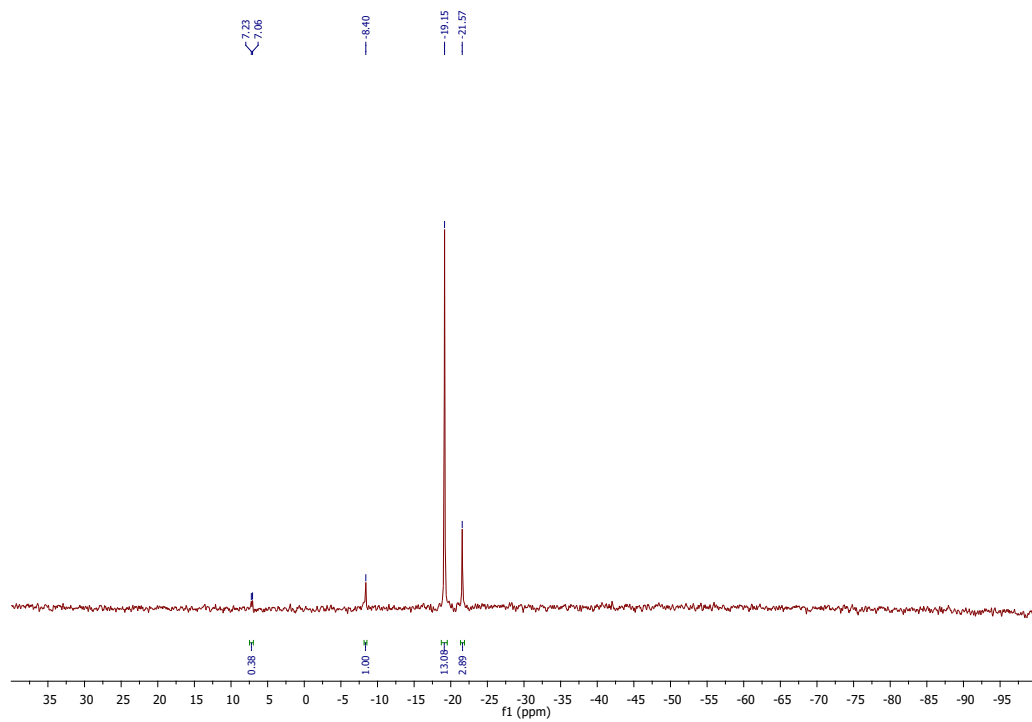

Figure S6:  $^{29}\text{Si}$ -NMR spectrum of depolymerization products of silicone oil **1** ( $D_3$ ,  $D_4$ ,  $D_5$ ) (25°C,  $\text{CDCl}_3$ , 59.6 MHz)

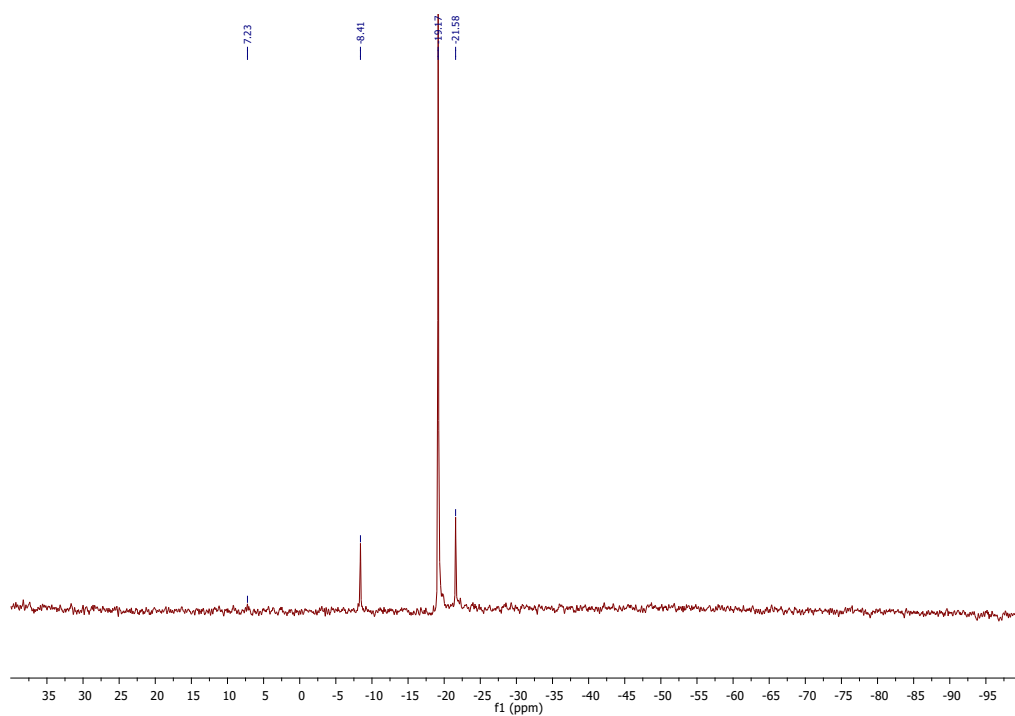

Figure S7:  $^{29}\text{Si}$ -NMR spectrum of depolymerization products of silicone oil **2** ( $D_3$ ,  $D_4$ ,  $D_5$ ) (25°C,  $\text{CDCl}_3$ , 59.6 MHz)

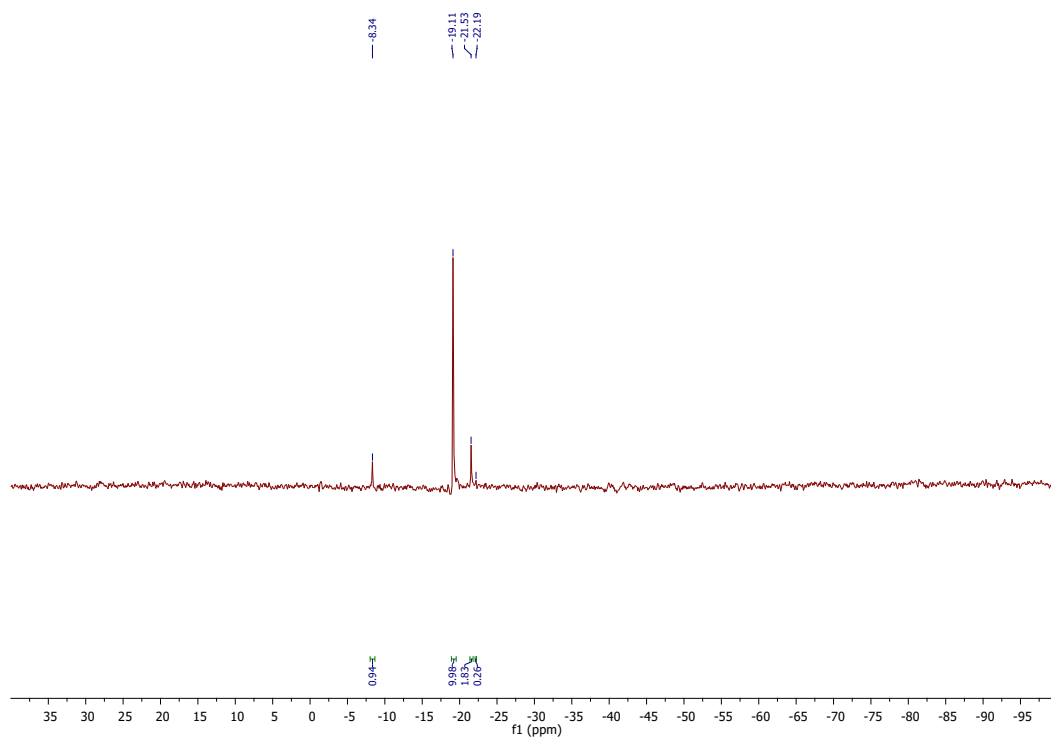

Figure S8:  $^{29}\text{Si}$ -NMR spectrum of depolymerization products of silicone gum **4 + 1** ( $D_3$ ,  $D_4$ ,  $D_5$ ) (25°C,  $\text{CDCl}_3$ , 59.6 MHz)

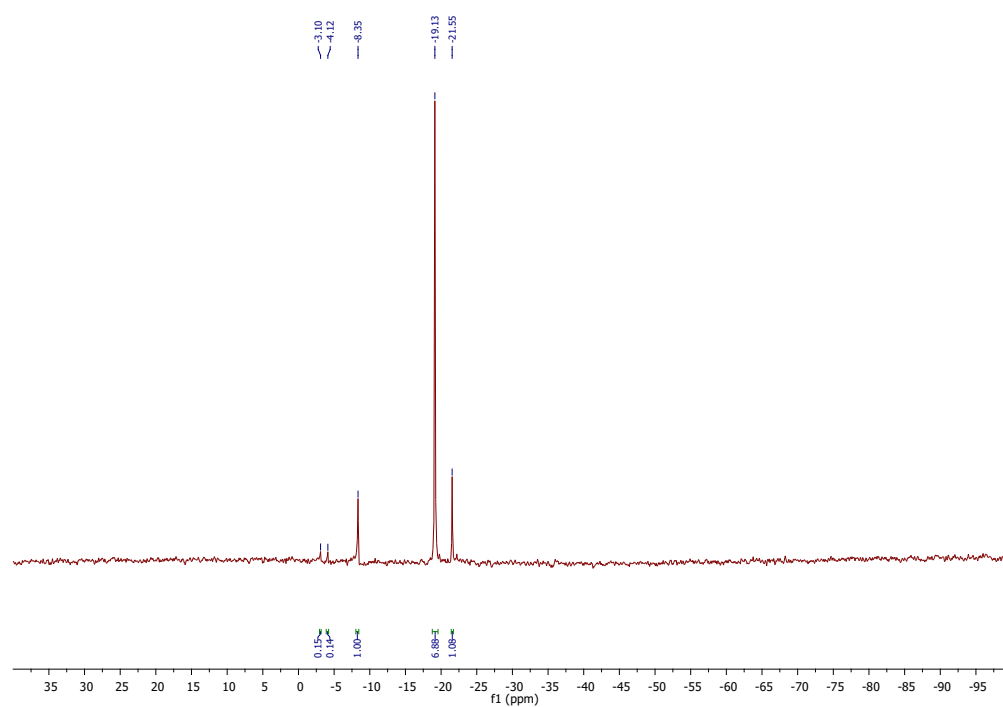

Figure S9:  $^{29}\text{Si}$ -NMR spectrum of depolymerization products of silicone oil **5** ( $D_3$ ,  $D_4$ ,  $D_5$ ) (25°C,  $\text{CDCl}_3$ , 59.6 MHz)

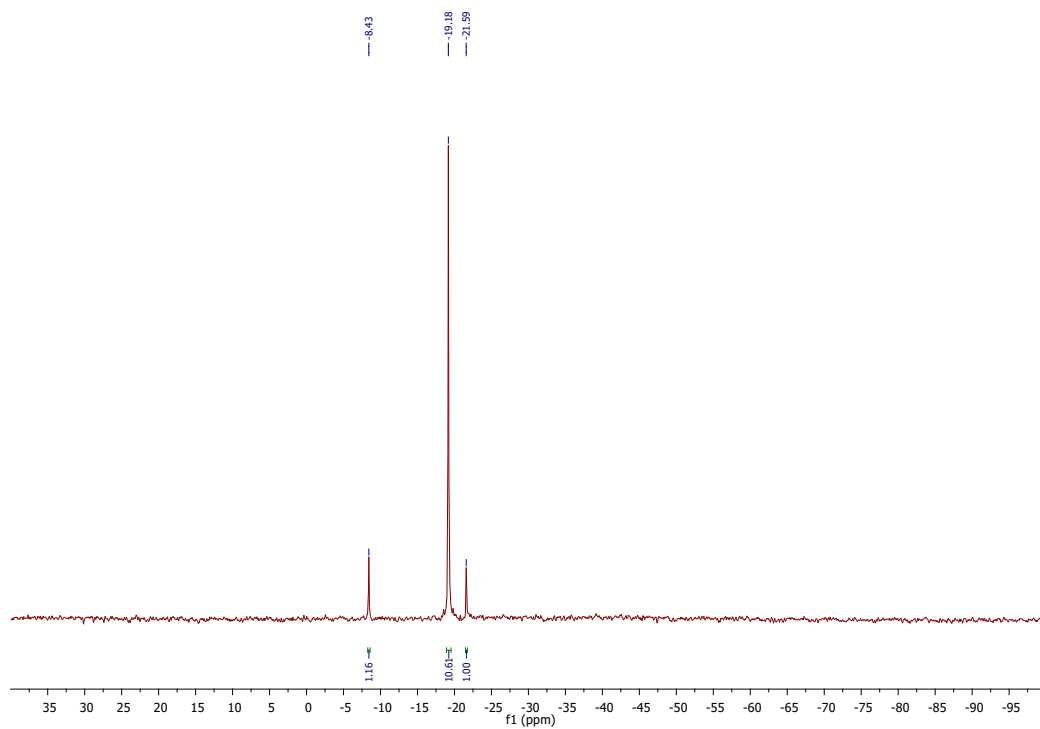

Figure S10:  $^{29}\text{Si}$ -NMR spectrum of depolymerization products of silicone oil **6** ( $D_3$ ,  $D_4$ ,  $D_5$ ) (25°C,  $\text{CDCl}_3$ , 59.6 MHz)

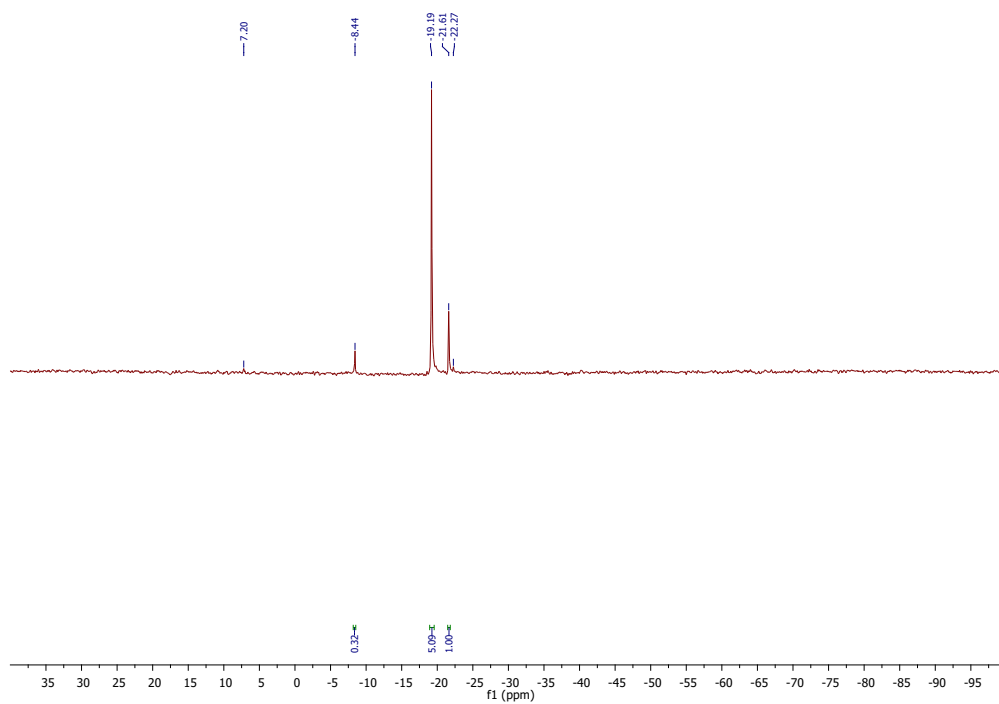

Figure S11:  $^{29}\text{Si}$ -NMR spectrum of depolymerization products of silicone oil **6 + 1** ( $D_3$ ,  $D_4$ ,  $D_5$ ) (25°C,  $\text{CDCl}_3$ , 59.6 MHz)



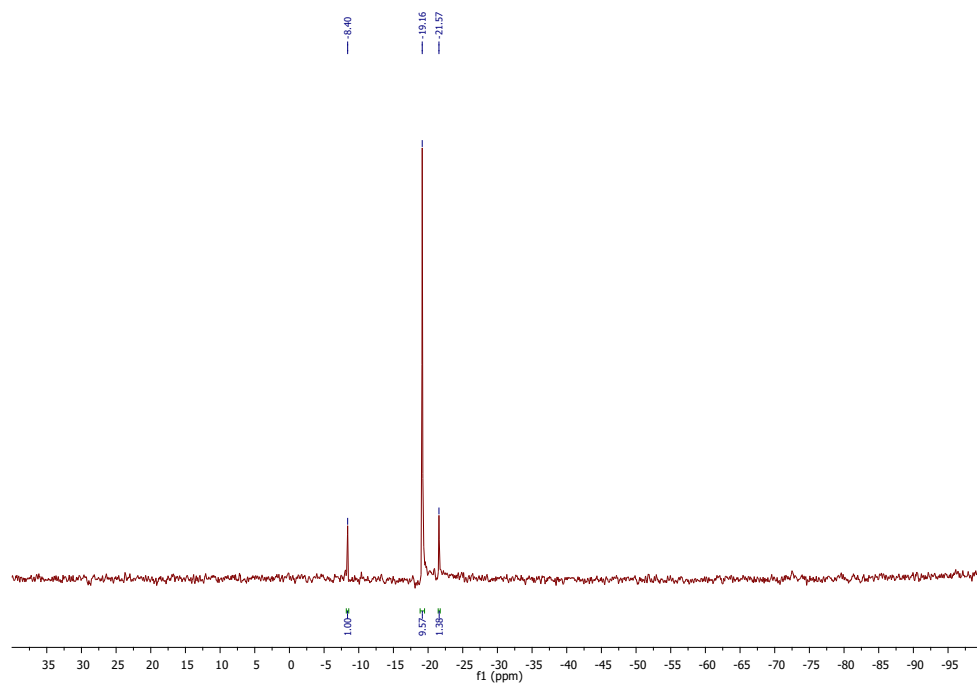

Figure S14:  $^{29}\text{Si}$ -NMR spectrum of depolymerization products of silicone oil **8** + **1** ( $D_3$ ,  $D_4$ ,  $D_5$ ) (25°C,  $\text{CDCl}_3$ , 59.6 MHz)

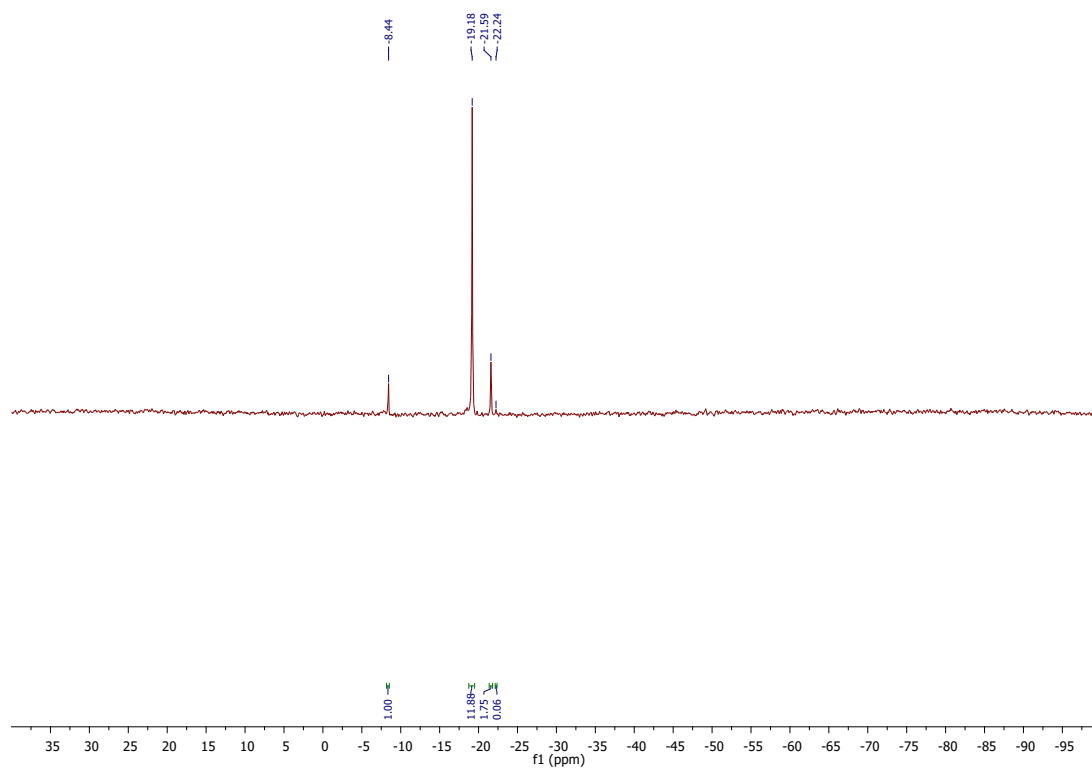

Figure S15:  $^{29}\text{Si}$ -NMR spectrum of depolymerization products of silicone oil **9** + **1** ( $D_3$ ,  $D_4$ ,  $D_5$ ) (25°C,  $\text{CDCl}_3$ , 59.6 MHz)

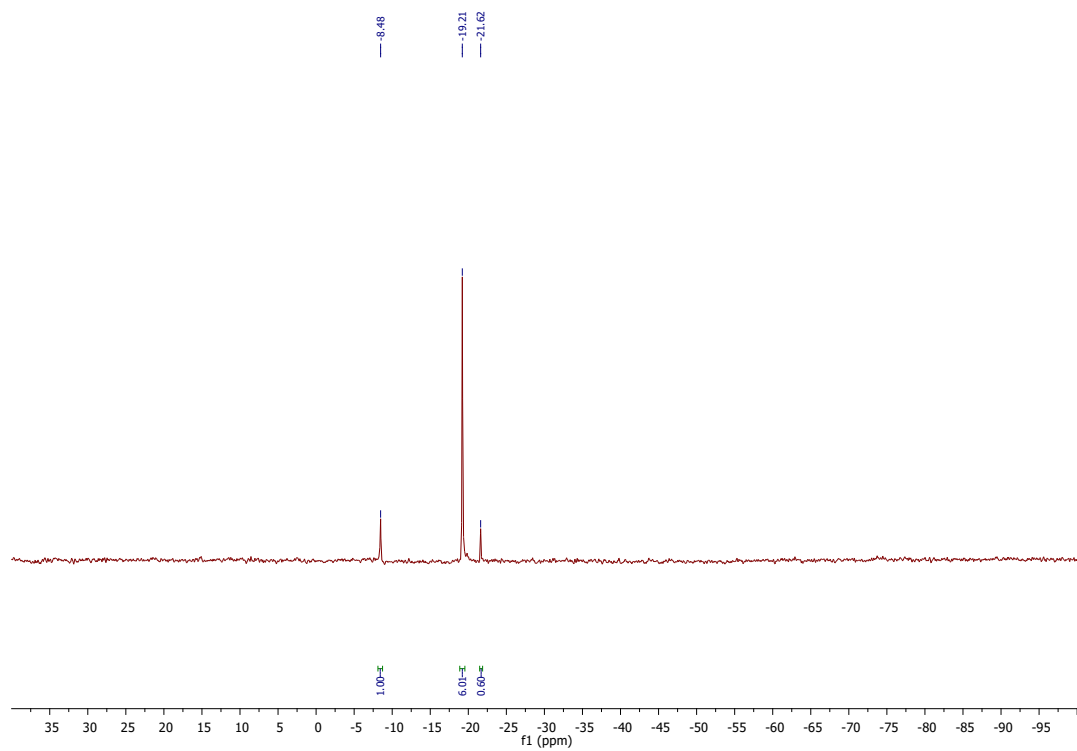

Figure S16:  $^{29}\text{Si}$ -NMR spectrum of depolymerization products of silicone oil **10** + **6** + **1** (25°C,  $\text{CDCl}_3$ , 59.6 MHz)

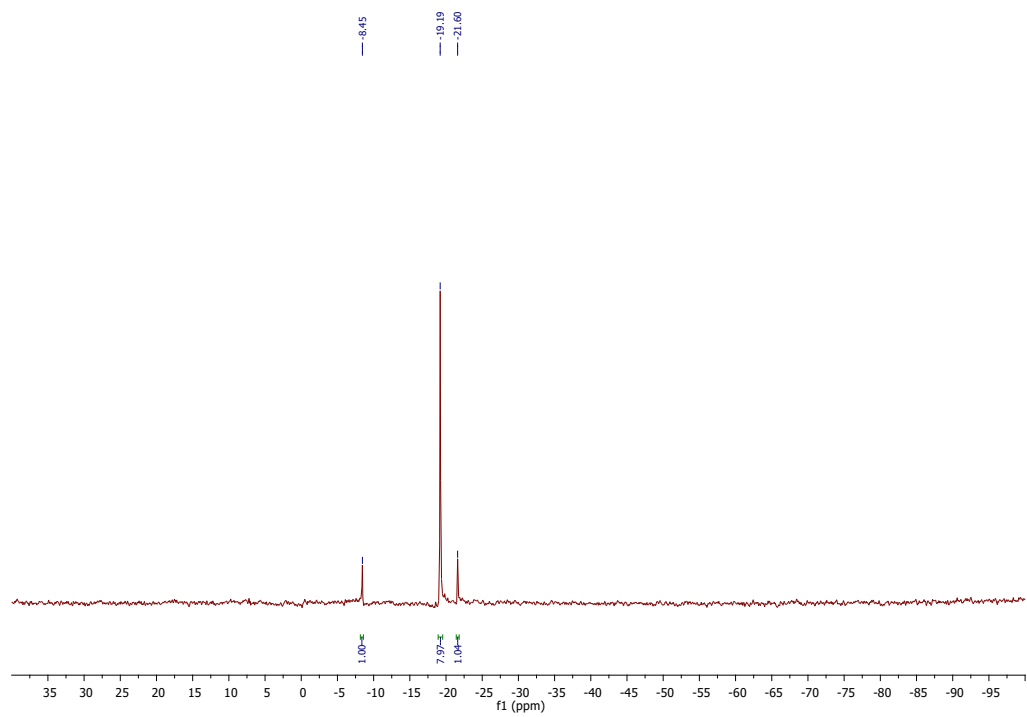

Figure S17:  $^{29}\text{Si}$ -NMR spectrum of depolymerization products of silicone oil **11** (25°C,  $\text{CDCl}_3$ , 59.6 MHz)

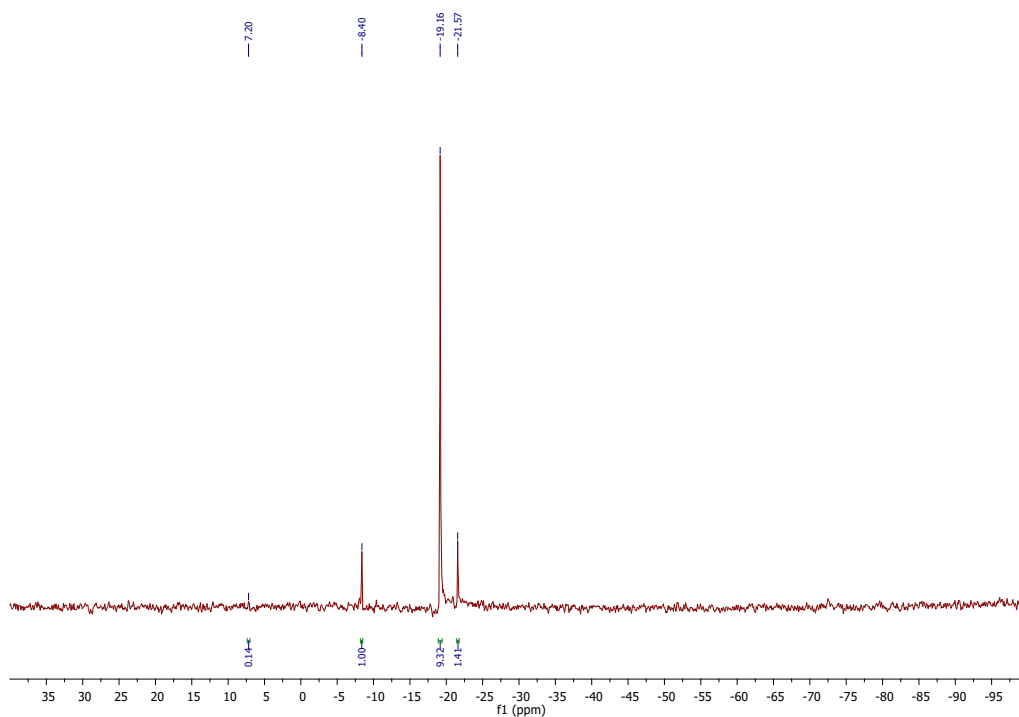

Figure S18:  $^{29}\text{Si}$ -NMR spectrum of depolymerization products of RTV2 + **1** (25°C,  $\text{CDCl}_3$ , 59.6 MHz)

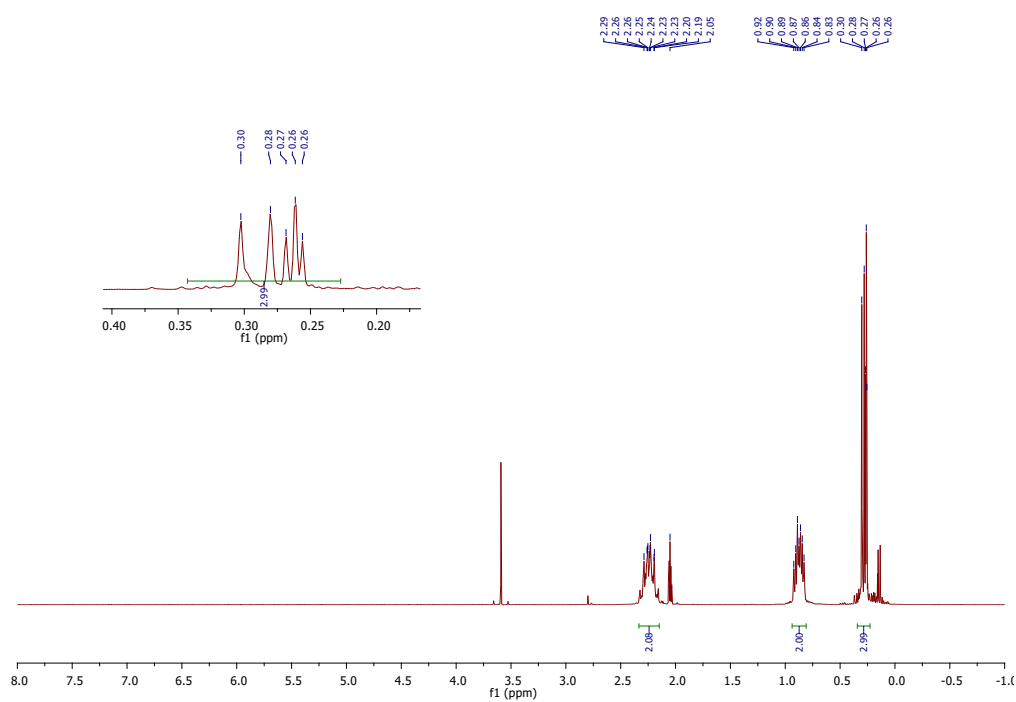

Figure S19:  $^1\text{H}$ -NMR spectrum of depolymerization products of silicone oil **12** (25°C,  $d_6$ -acetone, 300 MHz)

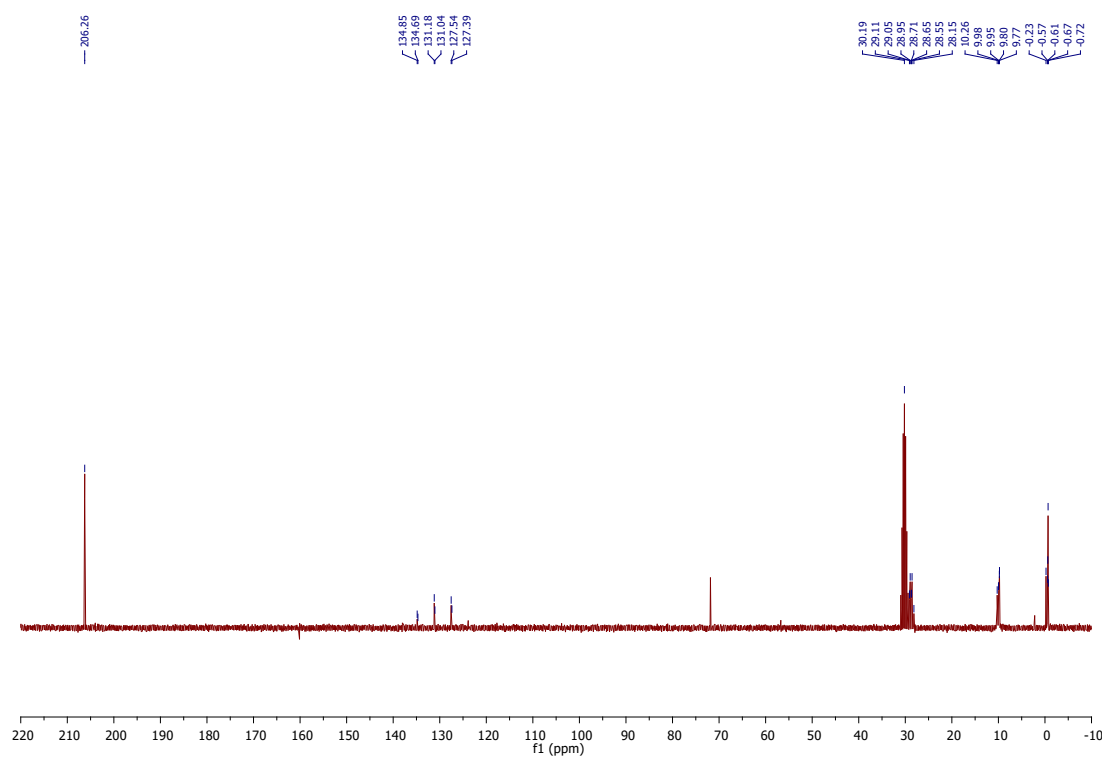

Figure S20:  $^{13}\text{C}$ -NMR spectrum of depolymerization products of silicone oil **12** (25°C,  $d_6$ -acetone, 75 MHz)

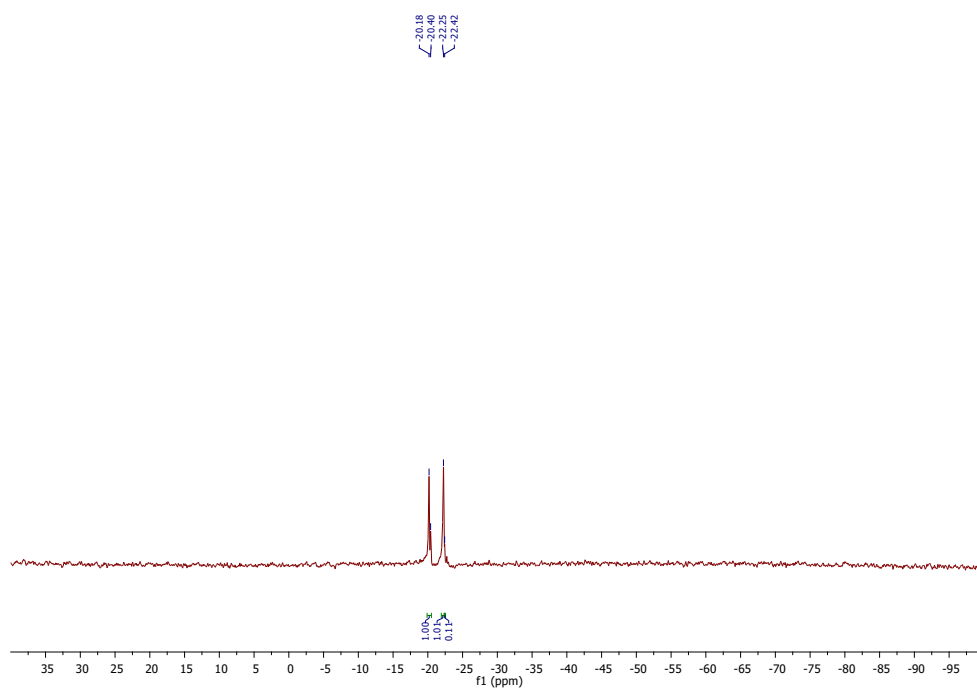

Figure S21:  $^{29}\text{Si}$ -NMR spectrum of depolymerization products of silicone oil **12** (25°C,  $d_6$ -acetone, 59.6 MHz)

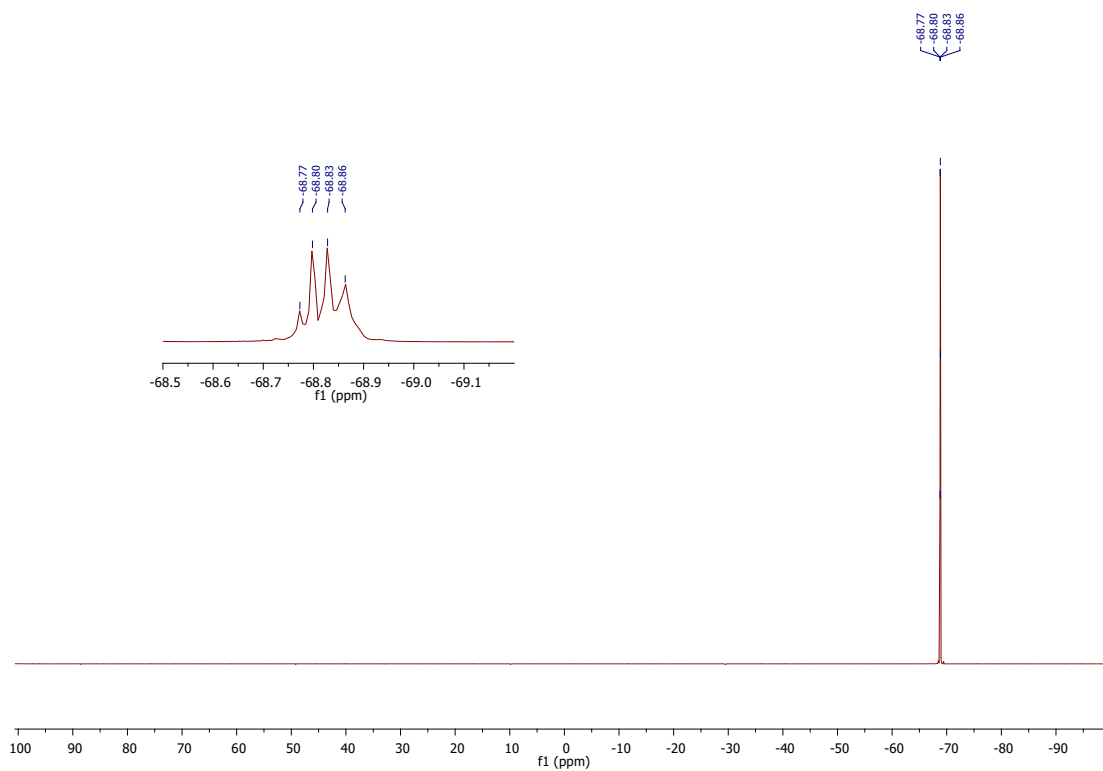

Figure S22:  $^{19}\text{F}$ -NMR spectrum of depolymerization products of silicone oil **12** (25°C,  $d_6$ -acetone, 284 MHz)

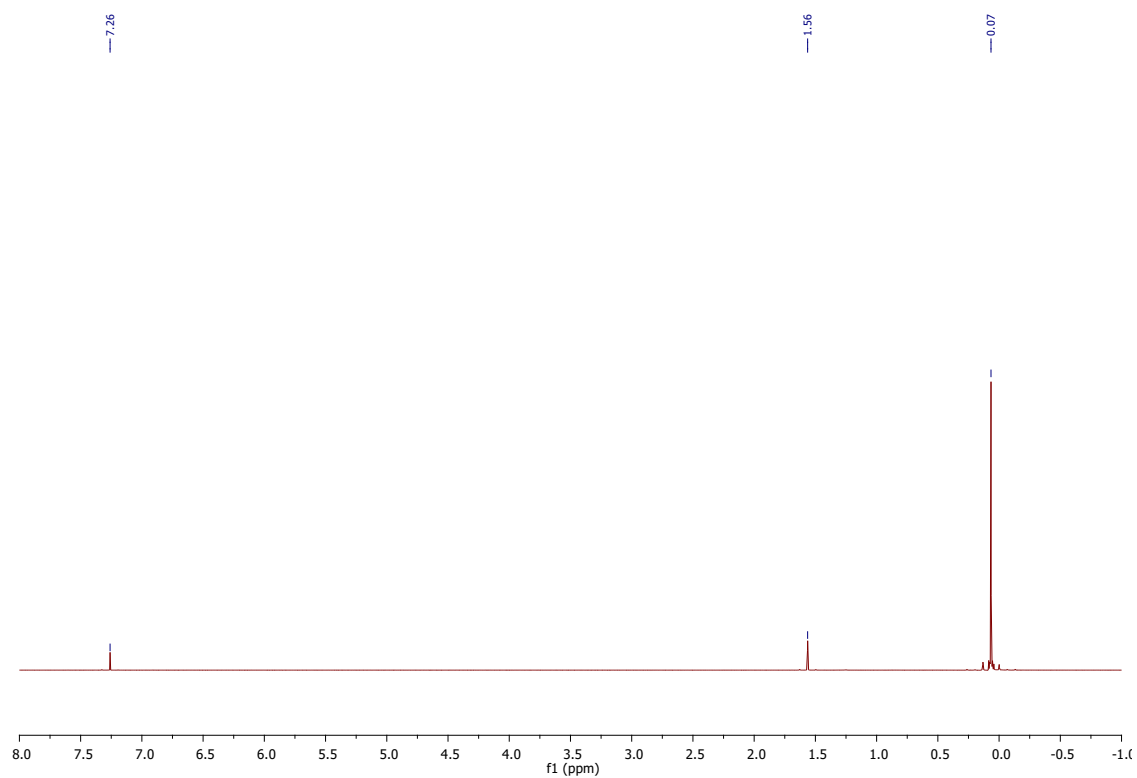

Figure S23:  $^1\text{H}$ -NMR spectrum of lab-synthesized silicone oil (25°C,  $\text{CDCl}_3$ , 300 MHz)

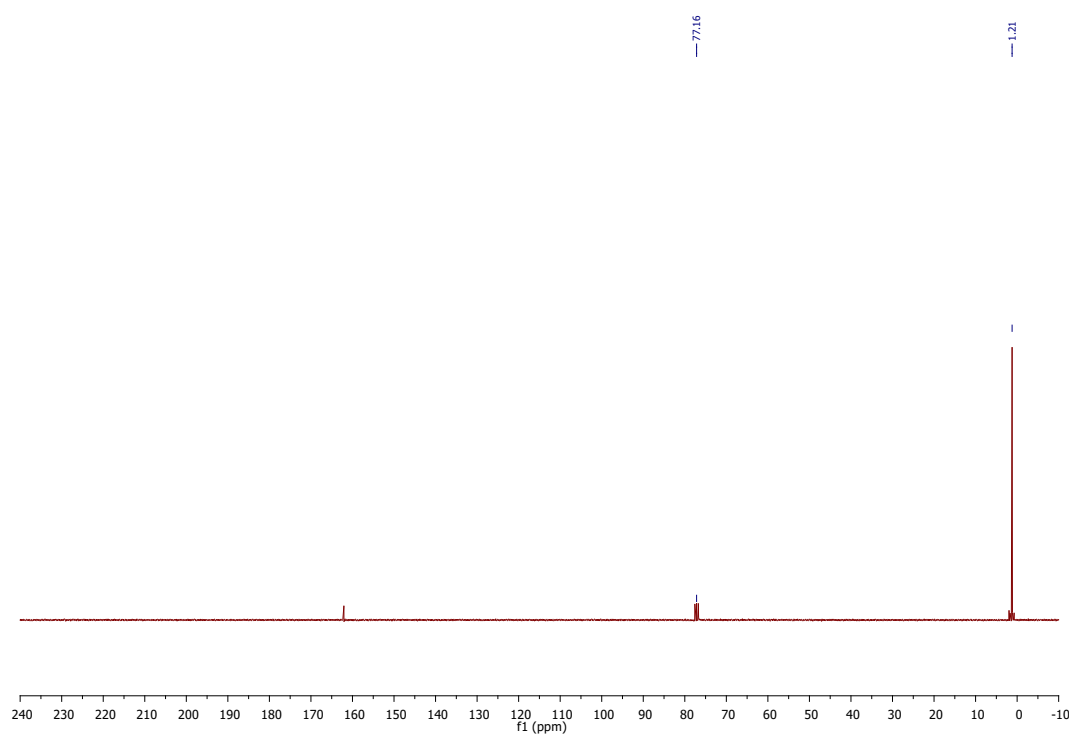

Figure S24:  $^{13}\text{C}$ -NMR spectrum of lab-synthesized silicone oil (25°C,  $\text{CDCl}_3$ , 75 MHz)

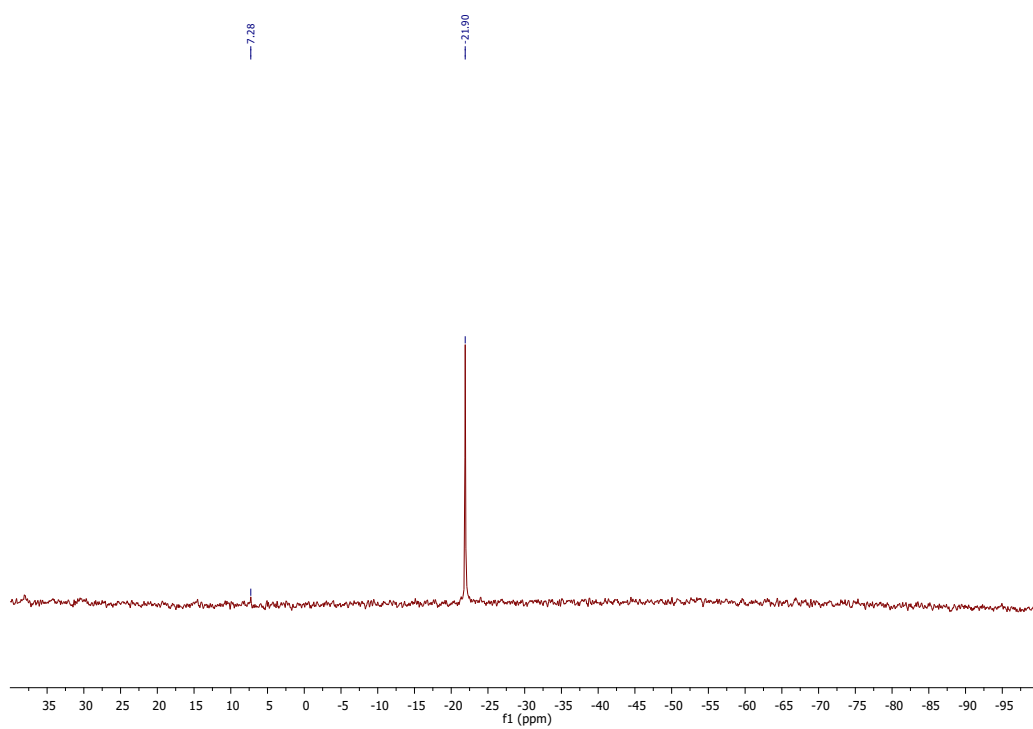

Figure S25:  $^{29}\text{Si}$ -NMR spectrum of lab-synthesized silicone oil (25°C,  $\text{CDCl}_3$ , 59.6 MHz)

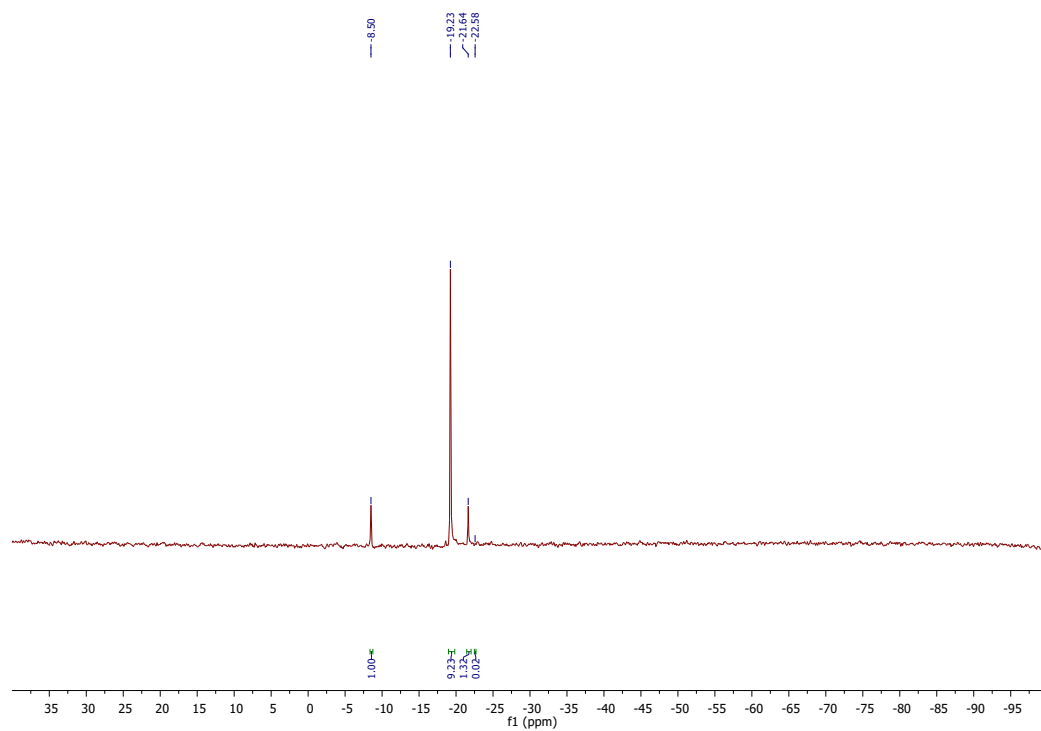

Figure S26:  $^{29}\text{Si}$ -NMR spectrum of depolymerization products of industrial silicone waste (25°C,  $\text{CDCl}_3$ , 59.6 MHz)

## 5. SEC analysis of lab-synthesized silicone oil

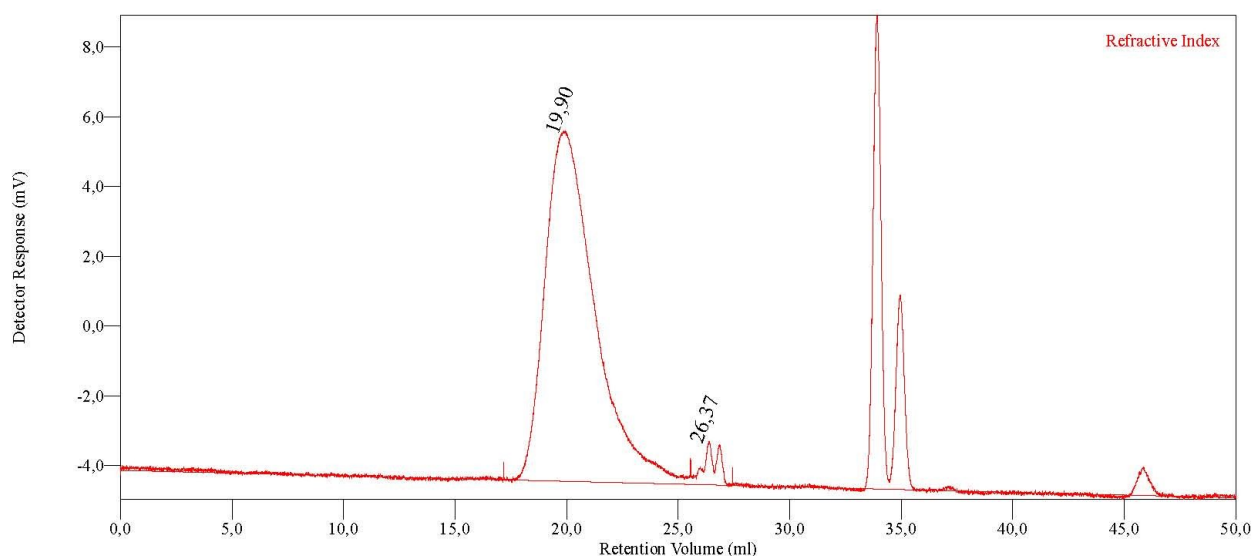

Conventional Calibration - Homopolymers : Results

|                     |         |         |
|---------------------|---------|---------|
| Peak RV - (ml)      | 19,897  | 26,373  |
| Mn - (Daltons)      | 8 180   | 473     |
| Mw - (Daltons)      | 16 468  | 484     |
| Mz - (Daltons)      | 25 440  | 495     |
| Mp - (Daltons)      | 17 072  | 490     |
| Mw / Mn             | 2,013   | 1,022   |
| Percent Above Mw: 0 | 100,000 | 100,000 |
| Percent Below Mw: 0 | 0,000   | 0,000   |
| Mw 10.0% Low        | 2 473   | 387     |
| Mw 10.0% High       | 42 319  | 624     |
| Wt Fr (Peak)        | 0,966   | 0,034   |
| RI Area - (mvm)     | 26,12   | 0,91    |
| UV Area - (mvm)     | 0,00    | 0,00    |

|                          |                              |
|--------------------------|------------------------------|
| Annotation               |                              |
| Method File              | 05-04-2022 sans FRM-0006.vcm |
| Limits File              |                              |
| Date Acquired            | Apr 29, 2022 - 09:25:19      |
| Solvent                  | Toluène                      |
| Acquisition Operator     | admin : Administrator        |
| Calculation Operator     | admin : Administrator        |
| Column Set               | GMHxl                        |
| System                   | Viscotek.Toluène             |
| Flow Rate - (ml/min)     | 1,000                        |
| Inj Volume - (ul)        | 100,0                        |
| Volume Increment - (ml)  | 0,00333                      |
| Detector Temp. - (deg C) | 35,0                         |
| Column Temp. - (deg C)   | 35,0                         |
| OmniSEC Build Number     | 406                          |

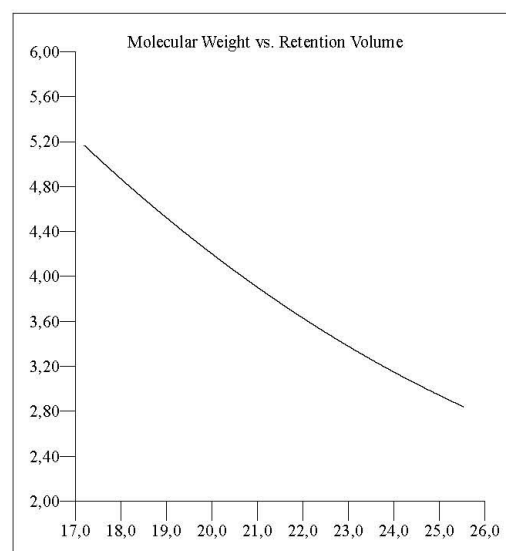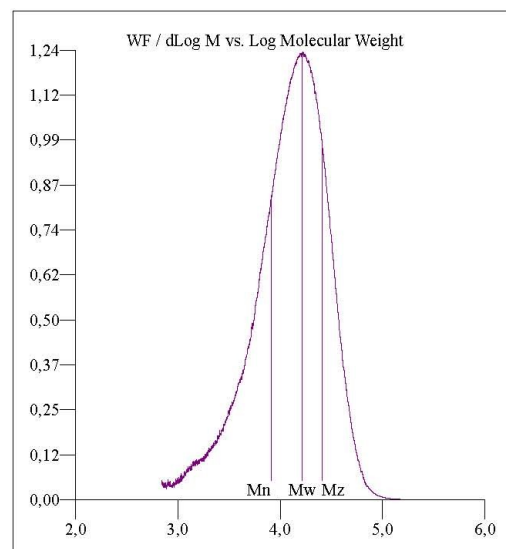

Figure S27: SEC chromatogram after incomplete devolatilization (some cyclics are still present, elution after 26mL or 26min)

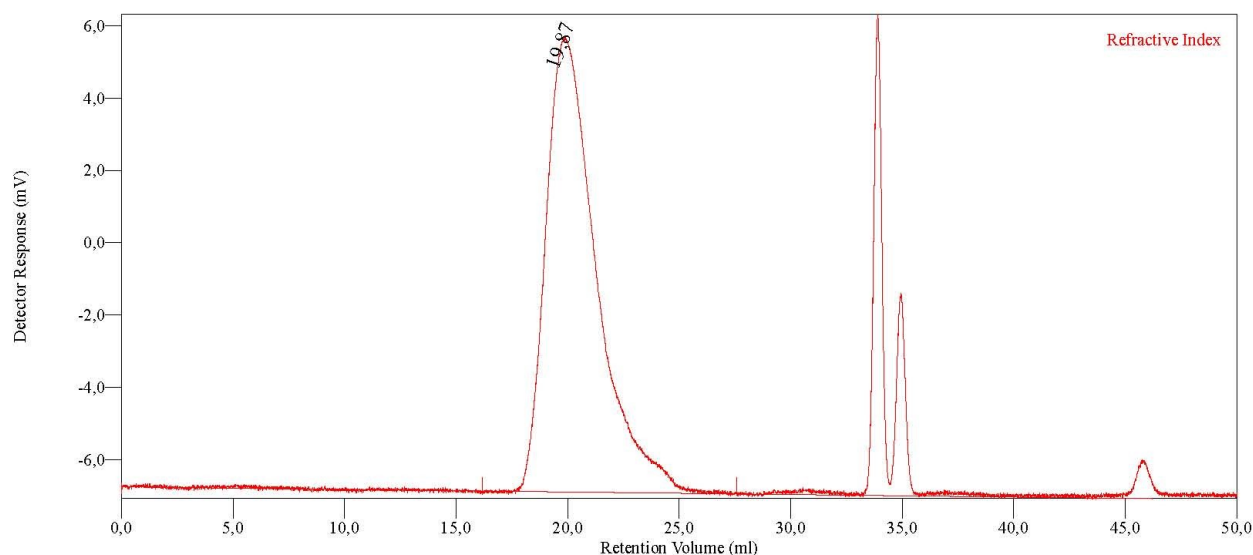

Conventional Calibration - Homopolymers : Results

|                     |         |
|---------------------|---------|
| Peak RV - (ml)      | 19,873  |
| Mn - (Daltons)      | 7 866   |
| Mw - (Daltons)      | 16 385  |
| Mz - (Daltons)      | 25 647  |
| Mp - (Daltons)      | 17 333  |
| Mw / Mn             | 2,083   |
| Percent Above Mw: 0 | 100,000 |
| Percent Below Mw: 0 | 0,000   |
| Mw 10.0% Low        | 2 336   |
| Mw 10.0% High       | 41 053  |
| Wt Fr (Peak)        | 1,000   |
| RI Area - (mvm)     | 33,12   |
| UV Area - (mvm)     | 0,00    |

|                          |                              |
|--------------------------|------------------------------|
| Annotation               |                              |
| Method File              | 05-04-2022 sans FRM-0006.vcm |
| Limits File              |                              |
| Date Acquired            | Apr 29, 2022 - 13:02:58      |
| Solvent                  | Toluène                      |
| Acquisition Operator     | admin : Administrator        |
| Calculation Operator     | admin : Administrator        |
| Column Set               | GMHx1                        |
| System                   | Viscotek.Toluène             |
| Flow Rate - (ml/min)     | 1,000                        |
| Inj Volume - (ul)        | 100,0                        |
| Volume Increment - (ml)  | 0,00333                      |
| Detector Temp. - (deg C) | 35,0                         |
| Column Temp. - (deg C)   | 35,0                         |
| OmniSEC Build Number     | 406                          |

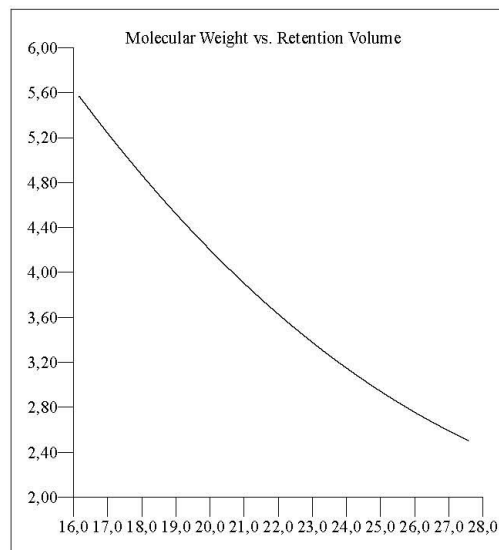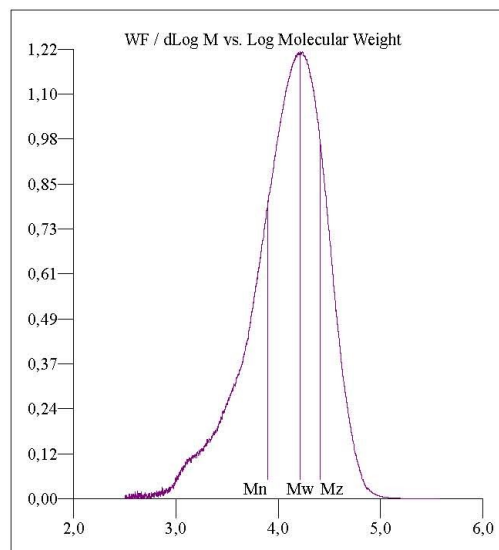

Figure S28: SEC chromatogram after complete devolatilization (absence of volatile cyclics: D3/D4/D5)
